# Supplementary material for: Improved photovoltaic performance and stability of perovskite solar cells by adoption of an n-type zwitterionic cathode interlayer
Source: Royal Society of Chemistry journal article supplement (doi:10.1039/d4mh00253a), 2024-01-01
Supplement: d4mh00253a1.pdf [file d4mh00253a1.pdf]

## Supporting Information

### **Improved Photovoltaic Performance and Stability of Perovskite Solar Cells by Adoption of an n-Type Zwitterionic Cathode Interlayer**

Young Wook Noh, †<sup>a</sup> Jung Min Ha, †<sup>b</sup> Jung Geon Son, <sup>c</sup> Jongmin Han, <sup>a</sup> Heunjeong Lee, <sup>d</sup> Dae Woo Kim, <sup>a</sup> Min Hun Hee, <sup>b</sup> Woo Gyeong Shin, <sup>a</sup> Shinuk Cho, <sup>d</sup> Jin Young Kim, <sup>c</sup> Myoung Hoon Song <sup>\*a</sup> and Han Young Woo <sup>\*b</sup>

<sup>a</sup> Y. W. Noh, J. Han, D. W. Kim, W. G. Shin, Prof. M. H. Song  
School of Materials Science and Engineering, Ulsan National Institute of Science and Technology (UNIST), UNIST-gil 50, Ulsan, 44919, Republic of Korea.  
\*E-mail: [mhsong@unist.ac.kr](mailto:mhsong@unist.ac.kr)

<sup>b</sup> J. M. Ha, M. H. Jee, Prof. H. Y. Woo  
Department of Chemistry, Korea University, Seoul 02841, Republic of Korea.  
\*E-mail: [hywoo@korea.ac.kr](mailto:hywoo@korea.ac.kr)

<sup>c</sup> J. G. Son, Prof. J. Y. Kim  
School of Energy and Chemical Engineering, Ulsan National Institute of Science and Technology (UNIST), UNIST-gil 50, Ulsan, 44919, Republic of Korea.

<sup>d</sup> H. Lee, Prof. S. Cho  
Department of Physics and EHSRC, University of Ulsan, Ulsan 44610, Republic of Korea.

Keywords: perovskite solar cells, zwitterion, cathode interlayer, ion capture, photovoltaic cells

## Experimental Section

### Materials

All chemicals used for the synthesis of the NDI molecules were purchased from Sigma-Aldrich and TCI Chemicals and used as received without further purification. [2-(3,6-Dimethoxy-9*H*-carbazol-9-yl)ethyl]phosphonic acid (MeO-2PACz, TCI), formamidine iodide (FAI, Greatcell Solar), lead iodide (PbI<sub>2</sub>, TCI), cesium iodide (CsI, ultra dry, 99.999% (metal basis), Alfa Aesar), fullerene (C<sub>60</sub>, 99.99%, OSM), and silver (Ag, 1-4 mm shot, 99.9999%, iTASCO) were purchased and used without any further purification.

### Synthesis

NDI-ZI and NDI-N were synthesized following the reported procedure.<sup>1, 2</sup>

*NDI-N*: <sup>1</sup>H NMR (500 MHz, CDCl<sub>3</sub>):  $\delta$  (ppm) 8.79 (s, 4H), 4.20 (t, 4H), 1.82 (m, 4H), 1.06 (t, 6H); <sup>13</sup>C NMR (125 MHz, CDCl<sub>3</sub>):  $\delta$  (ppm) 162.9 (C=O), 131.0 (Ar C), 126.7 (Ar C), 126.6 (Ar C), 42.4 (CH<sub>2</sub>), 21.4 (CH<sub>2</sub>), 11.5 (CH<sub>3</sub>).

*NDI-ZI*: <sup>1</sup>H NMR (500 MHz, D<sub>2</sub>O):  $\delta$  (ppm) 8.63 (s, 4H), 4.22 (t, 4H), 3.47 (t, 4H), 3.33 (t, 4H), 3.07 (s, 12H), 2.83 (t, 4H), 2.22 (m, 4H), 1.87 (m, 4H), 1.72 (m, 4H); <sup>13</sup>C NMR (125 MHz, D<sub>2</sub>O):  $\delta$  (ppm) 164.0 (C=O), 131.1 (Ar C), 126.0 (Ar C), 125.9 (Ar C), 63.4 (CH<sub>2</sub>-N), 61.5 (CH<sub>2</sub>-N), 50.7 (CH<sub>2</sub>-S), 49.9 (CH<sub>3</sub>-N), 43.0 (CH<sub>2</sub>), 37.7 (CH<sub>2</sub>), 21.1 (CH<sub>2</sub>), 20.9 (CH<sub>2</sub>).

### Instruments and Characterization

The <sup>1</sup>H and <sup>13</sup>C NMR spectra were measured using a Bruker Advance III HD system operating at 500 and 125 MHz, respectively. The UV-vis absorption spectra were measured using a Jasco V-730 UV-vis spectrometer. The absorption spectrum of tetramethylammonium iodide (TMAI) + I<sub>2</sub> was obtained from a 2:1 (w/w) mixture of TMAI and solid I<sub>2</sub> dissolved in water at a total concentration of 2%. The absorption spectrum of gaseous I<sub>2</sub> was obtained by heating the solid I<sub>2</sub> at 50 °C in an N<sub>2</sub>-purged PMMA cuvette. To measure the absorption spectra of the NDI films

with I<sub>2</sub> gas, the NDI derivatives were dissolved in trifluoroethanol (2 mg/mL) and spin-coated onto a glass substrate at 2000 rpm. The NDI-ZI and NDI-N films were heated together for 30 min in a Petri dish with a 1:1 mixture of solid I<sub>2</sub> and silica gel (2 g) under ambient conditions. The distribution of silver in the perovskite/C<sub>60</sub>/NDI-ZI/silver sandwich cell was analyzed using ToF-SIMS (ION-TOF, Germany) with Bi<sup>3+</sup> (30 keV) as the primary ion source. The area of analysis was 100 μm × 100 μm. Sputter etching was performed using an Ar-gas cluster ion beam with an accelerating voltage of 2.5 keV. The *J-V* characteristics of the PeSCs were measured under AM 1.5 G (100 mW cm<sup>-2</sup>) with a scan rate of 300 mV s<sup>-1</sup> and scan step of 10 mV. A PEC-L01 solar simulator was used for illumination, and the intensity was calibrated using a Newport 91150-KG5 Si reference cell. Scanning electron microscopy images and energy-dispersive X-ray spectroscopy data were obtained using an SU8220 Cold FESEM operated at 10 kV. UPS (AXIS Nova, Kratos Analytical) measurements were performed using a He (21.2 eV) ultraviolet source. X-ray photoelectron spectroscopy was performed using a K-alpha system operating from 200 to 3 keV. TPC and TPV data were measured using a T4000 instrument (McScience). The external quantum efficiency spectra were measured using a QEX7 quantum efficiency measurement system. An antireflection film was fabricated using polydimethylsiloxane cast on a fluorinated random pyramid-textured Si wafer as a mold.<sup>3</sup>

## Device Fabrication

ITO-coated glass substrates were first washed sequentially with deionized water, acetone, and isopropyl alcohol under sonication for 10 minutes. Subsequently, the cleaned substrates underwent treatment with UV-O<sub>3</sub> for 30 minutes and were then transferred to a N<sub>2</sub> glove box. MeO-2PACz (1 mg mL<sup>-1</sup> in ethanol) was spin-coated at 5000 rpm for 30 seconds, followed by annealing at 100 °C for 10 minutes. After cooling, the films were rinsed by spin-casting ethanol solvent at 5000 rpm for 25 seconds. For the FA<sub>0.85</sub>Cs<sub>0.15</sub>PbI<sub>3</sub> precursor, 1.445 mmol of FAI, 0.255 mmol of CsI, and 1.7 mmol of PbI<sub>2</sub> were dissolved in 700 μL DMF and 300 μL DMSO.

The perovskite precursor solution was spin-coated at 500 rpm for 7 seconds and then at 3000 rpm for 25 seconds. After 21 seconds, ethyl acetate (0.45 mL) was added on top of the perovskite layer during spin-coating. Thermal annealing at 100 °C for 1 hr followed. A 30-nm-thick C<sub>60</sub> layer was then deposited under high vacuum ( $< 5 \times 10^{-6}$  torr) at an evaporation rate of 0.3 Å/s. The NDI-ZI layer was spin-coated onto the C<sub>60</sub> layer at 5000 rpm for 30 seconds, followed by annealing at 100 °C for 10 minutes. Finally, a 100-nm-thick silver electrode was thermally deposited under high vacuum. The device area (13.5 mm<sup>2</sup>) was defined by the patterned metal mask used for the thermal deposition of silver.

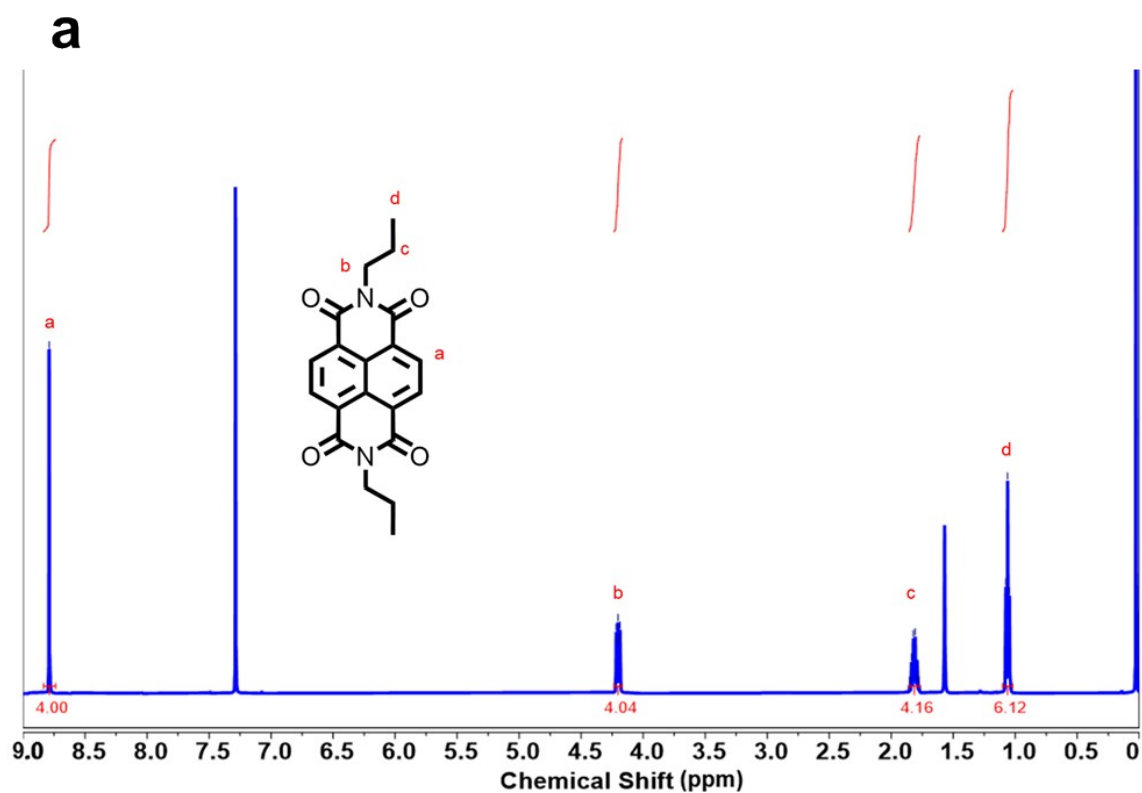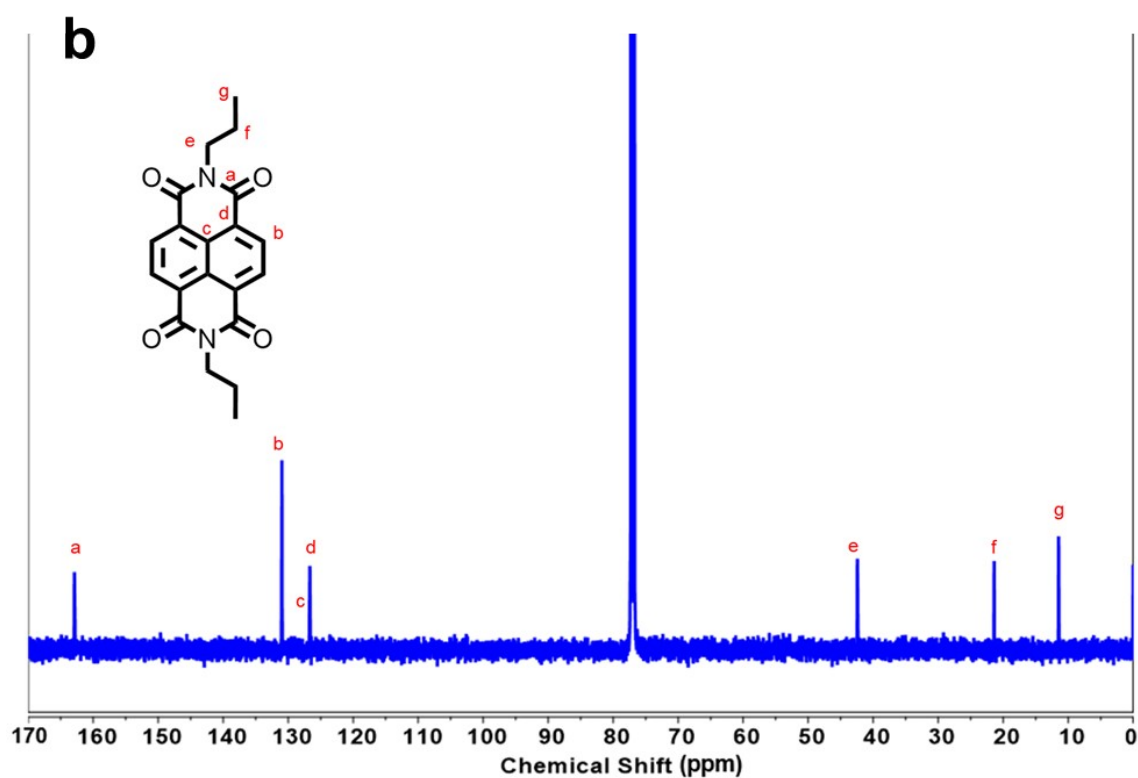

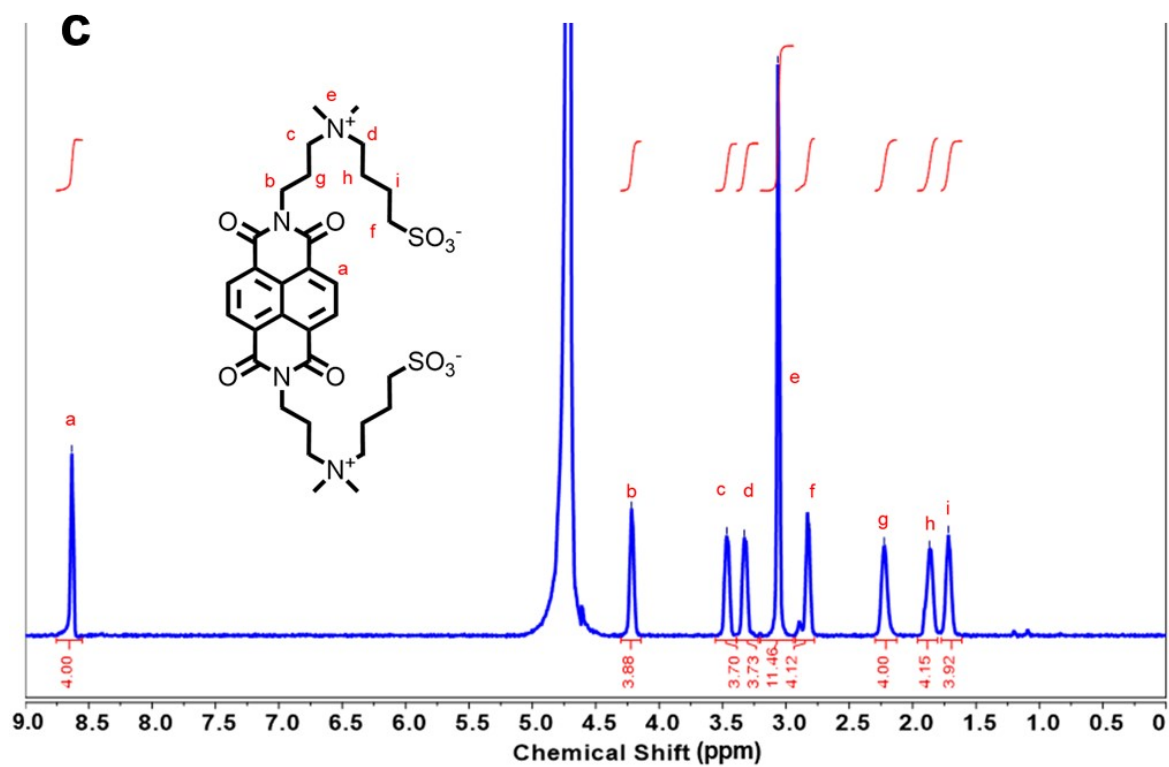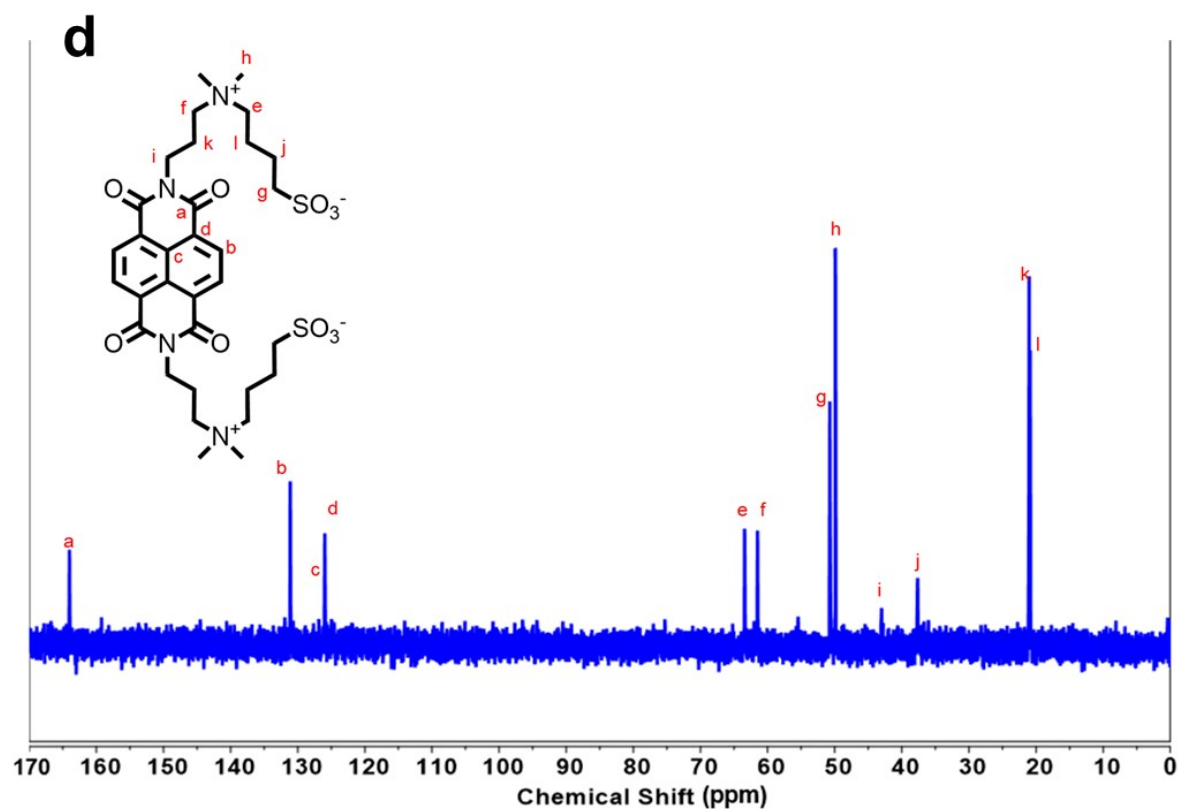

**Fig. S1** (a)  $^1\text{H}$ -NMR and (b)  $^{13}\text{C}$ -NMR spectra of NDI-N in  $\text{CDCl}_3$ . (c)  $^1\text{H}$ -NMR and (d)  $^{13}\text{C}$ -NMR spectra of NDI-ZI in  $\text{D}_2\text{O}$ .

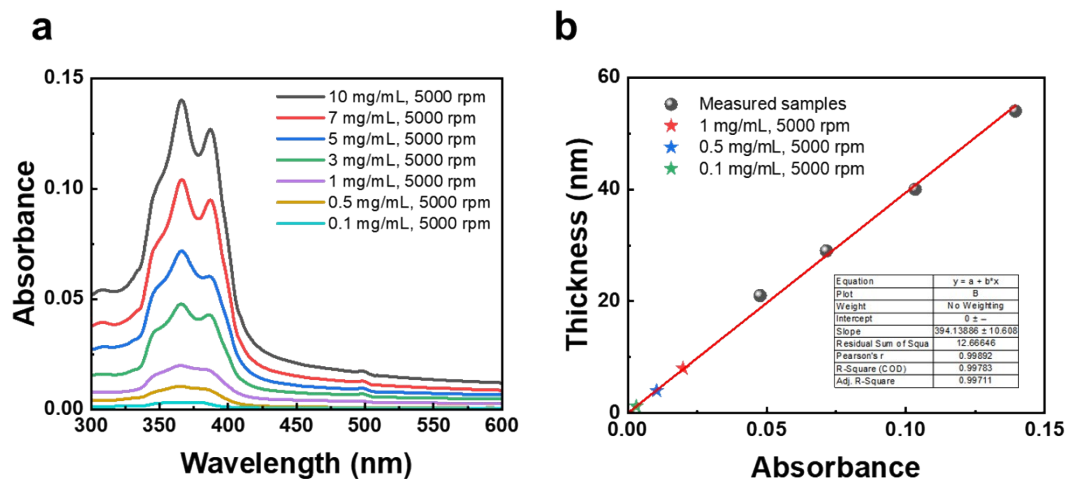

**Fig. S2** (a) UV-vis absorbance spectra of NDI-ZI thin films with different concentrations. (b) Linear fitting of absorbance versus thickness of NDI-ZI films.

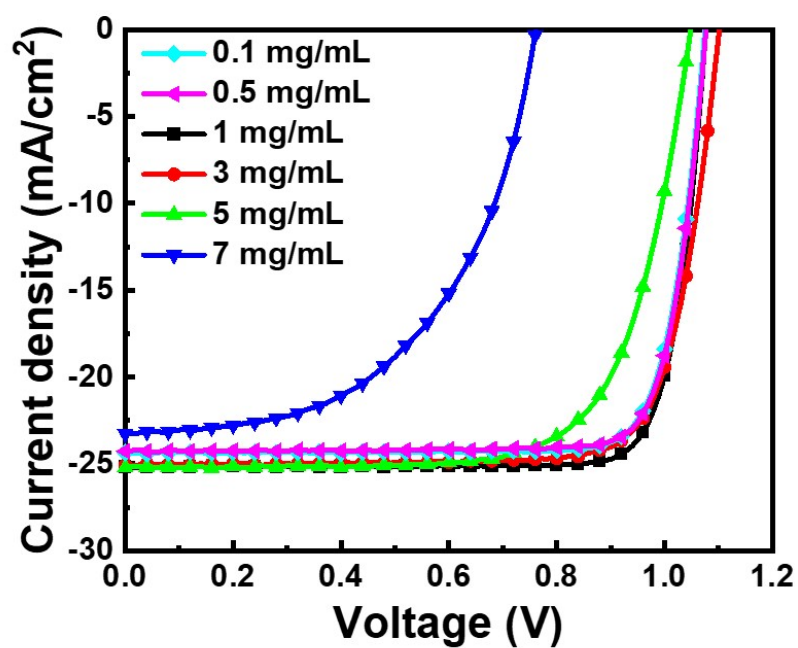

**Fig. S3**  $J$ - $V$  curves of PeSCs by varying the thickness of NDI-ZI interlayer.

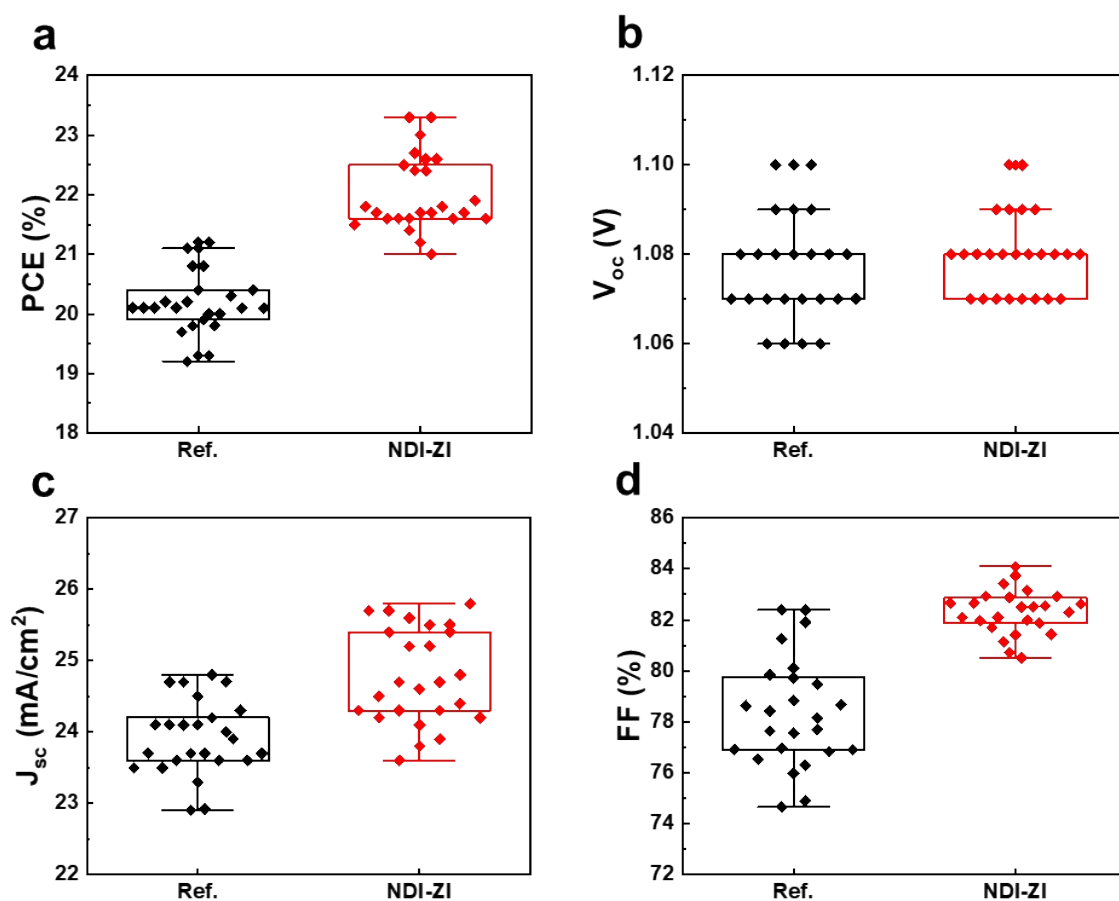

**Fig. S4** Statistical photovoltaic data of (a) PCE, (b)  $V_{OC}$ , (c)  $J_{SC}$ , and (d) FF for PeSCs with and without NDI-ZI (based on 25 separated measurements).



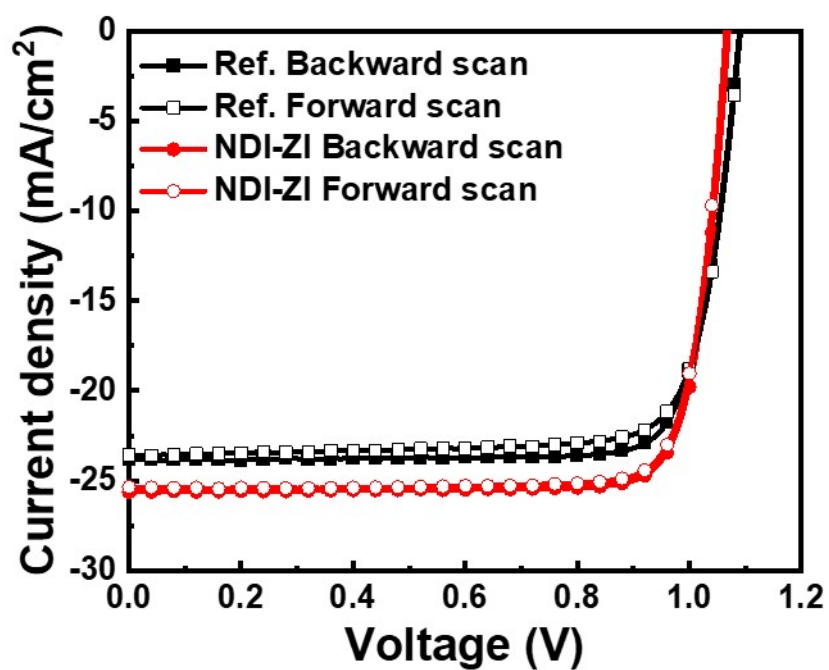

**Fig. S5**  $J$ - $V$  curves of PeSCs with and without NDI-ZI interlayer under both backward and forward scans.

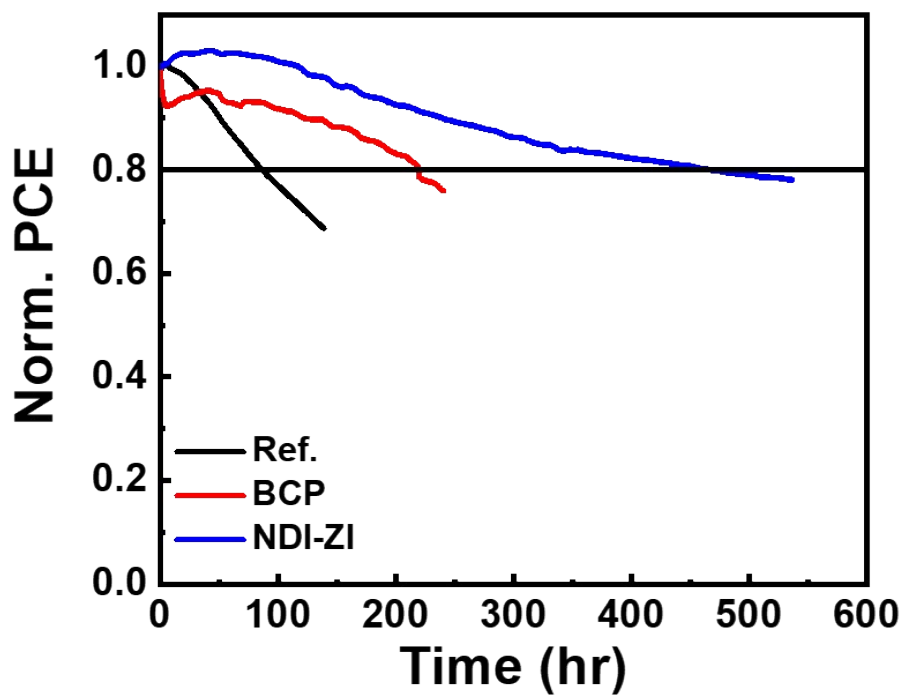

**Fig. S6** Device stability at MPP condition (AM 1.5G illumination) without, with BCP, and with NDI-ZI cathode interlayer.

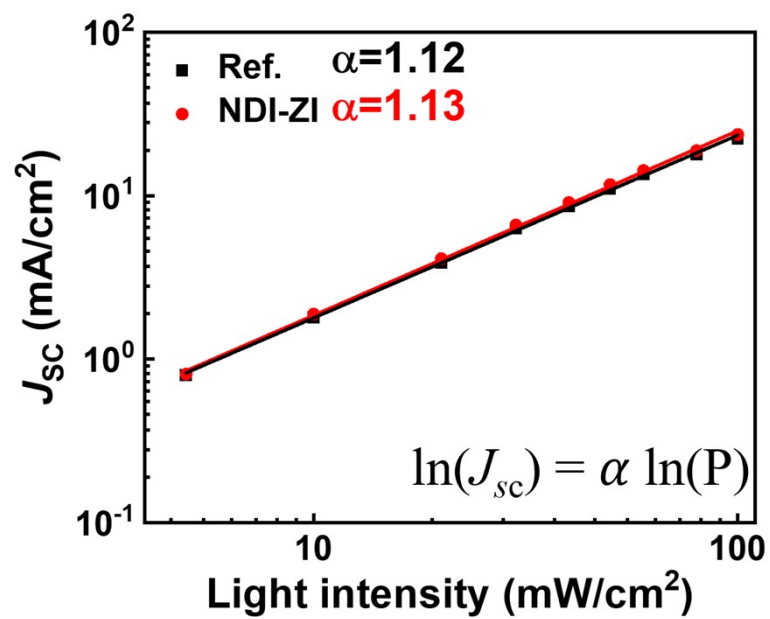

**Fig. S7** Light intensity dependent  $J_{sc}$  characteristics with and without NDI-ZI.

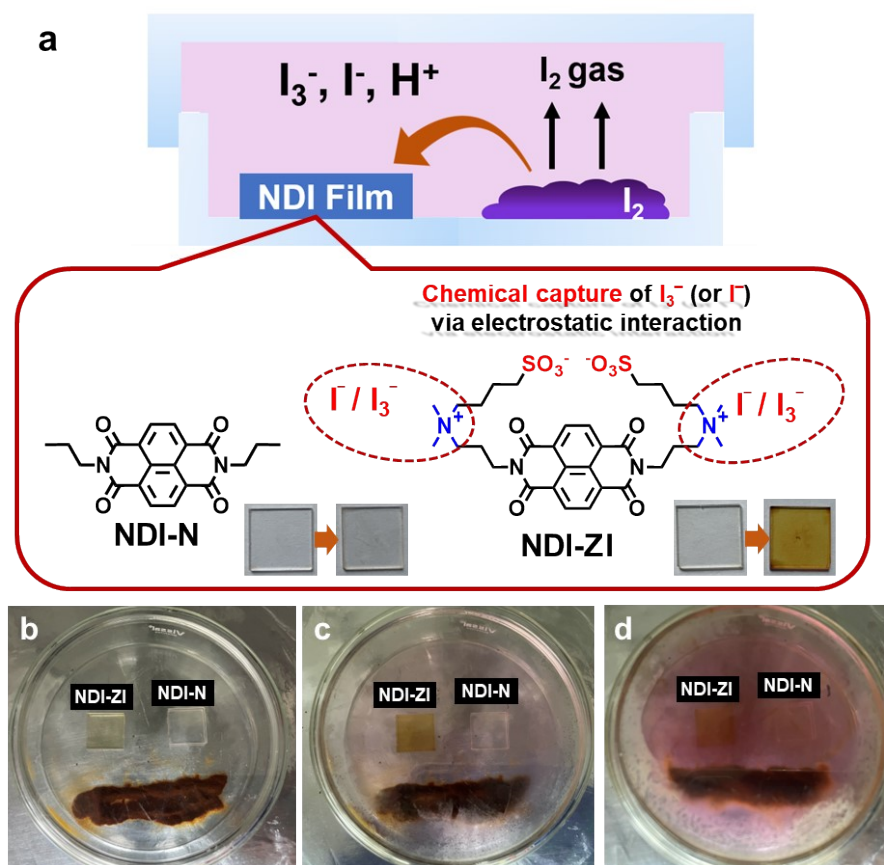

**Fig. S8** (a) Schematic of  $I^-$  and  $I_3^-$  capture of NDI films under  $I_2$  sublimation. Photographic images of NDI-N and NDI-ZI films exposed to  $I_2$  sublimation at different temperatures; (b) room temperature, (c) 90 °C, (d) 120 °C.

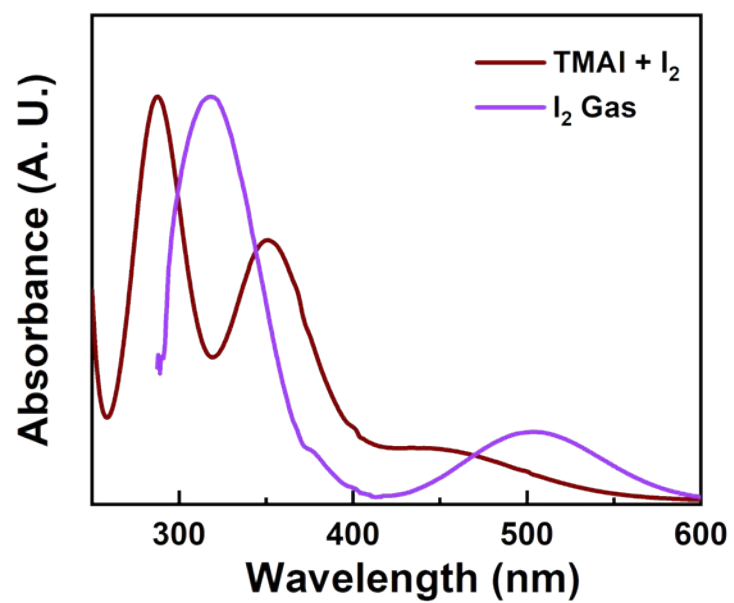

**Fig. S9** UV-vis absorption spectra of a mixture (1:1 mol%) of tetramethyl ammonium iodide and I<sub>2</sub> in water, and iodine gas.

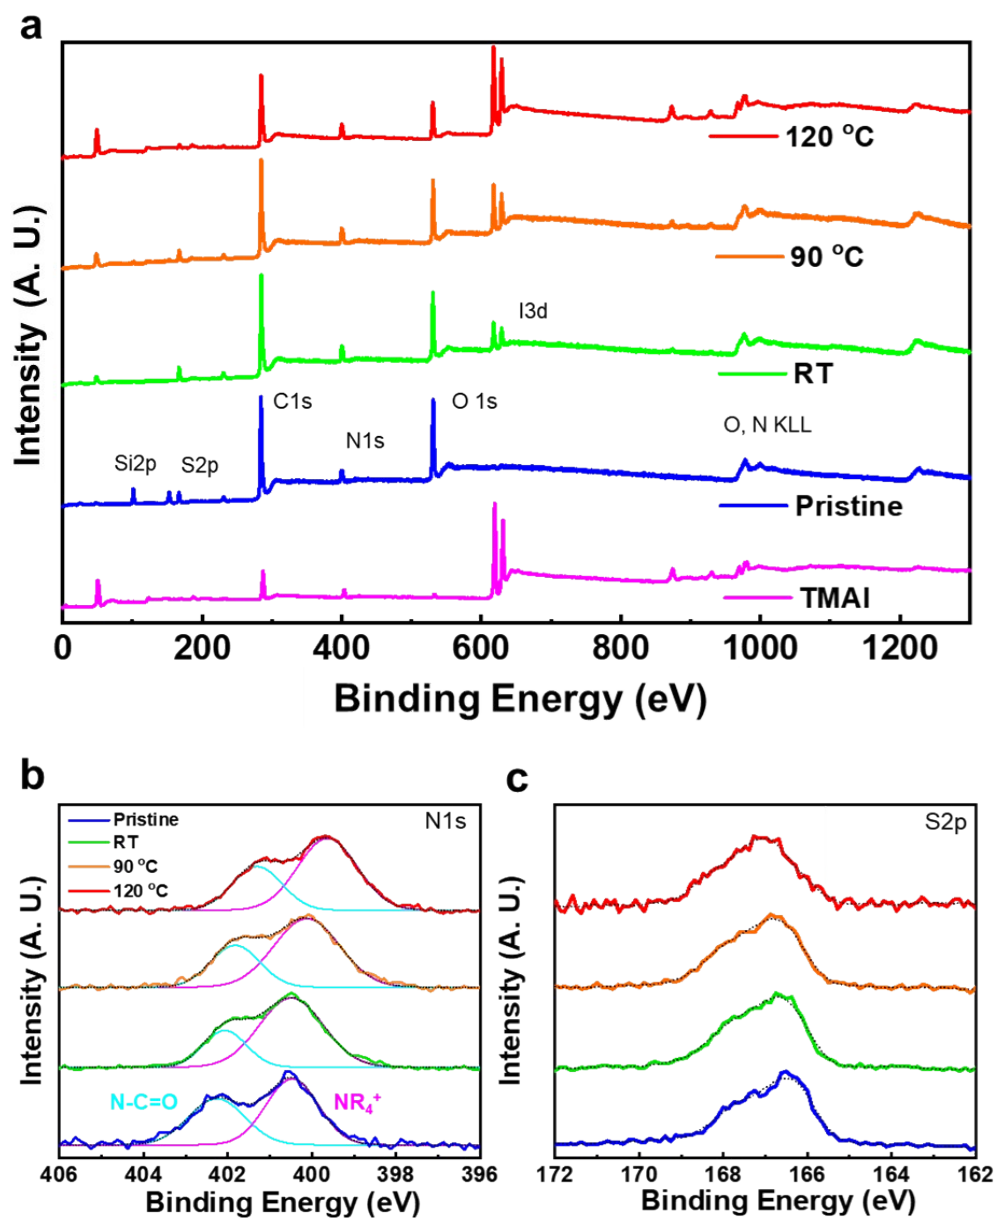

**Fig. S10** XPS measurements. (a) survey mode spectra, and core level spectra of (b) N 1s and (c) S 2p core electrons obtained from NDI-ZI films exposed to iodine gas at different temperature.

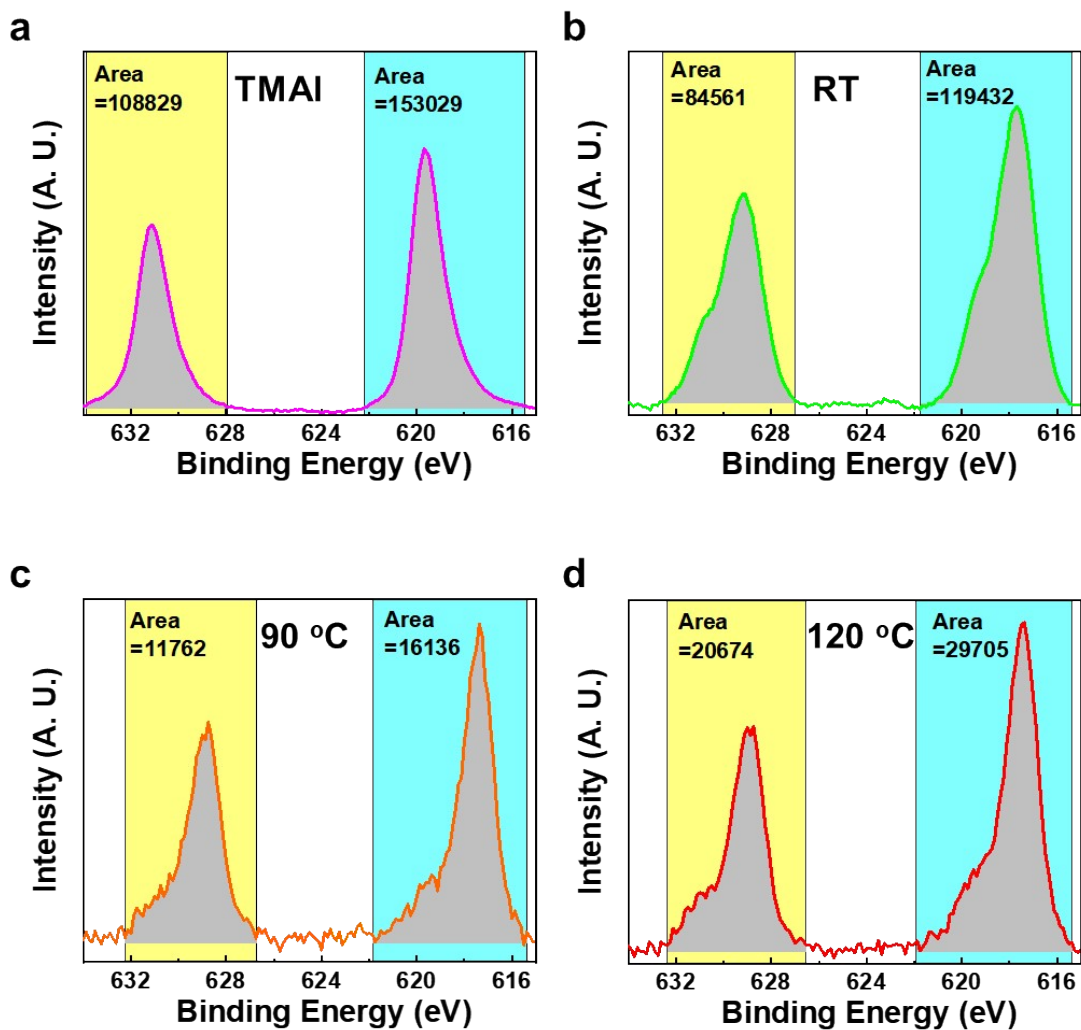

**Fig. S11** XPS peak area ( $3d_{5/2}:3d_{3/2}$ ) of (a) TMAI (as a reference) and NDI-ZI films exposed to iodine gas at (b) RT, (c) 90 °C, and (d) 120 °C.

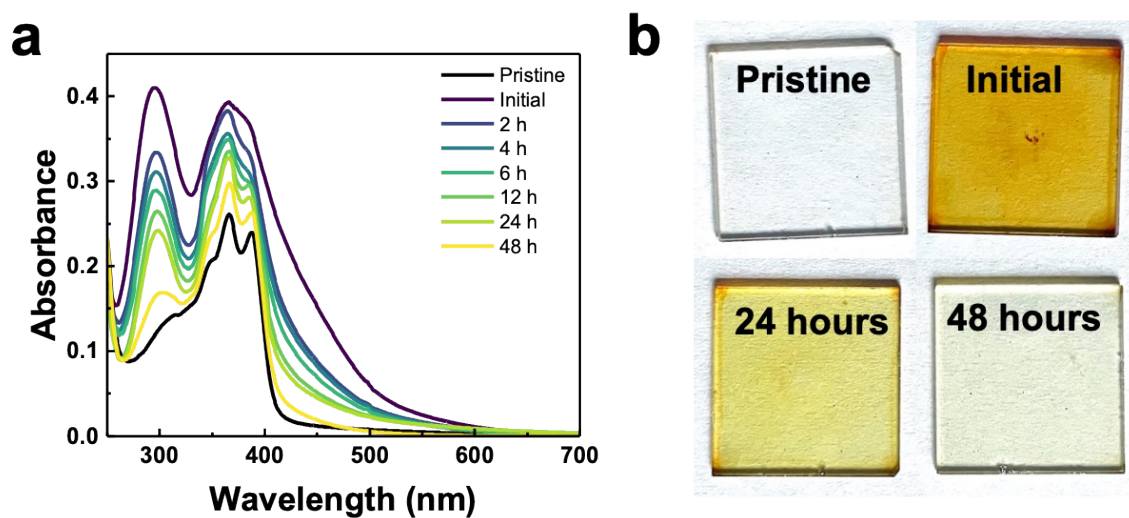

**Fig. S12** (a) UV-vis spectral changes and (b) photographic images of NDI-ZI films (exposed to I<sub>2</sub> sublimation) stored in an ambient environment.

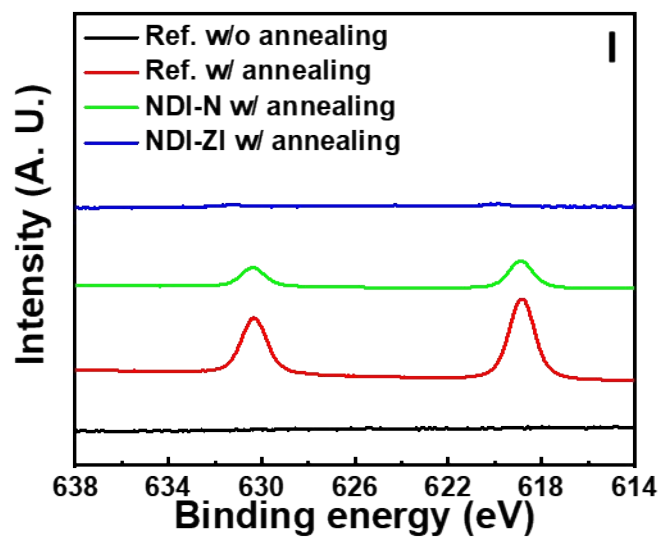

**Fig. S13** I 3d XPS signals of top surface of Ag electrode with a thermal treatment at 120 °C for 24 hrs.

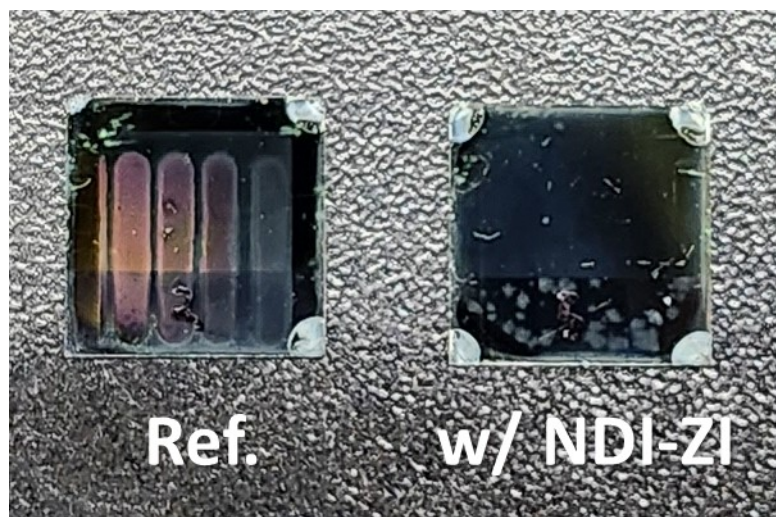

**Fig. S14** Photographic images of PeSCs with and without NDI-ZI after thermal treatments at 120 °C for 24 hrs.



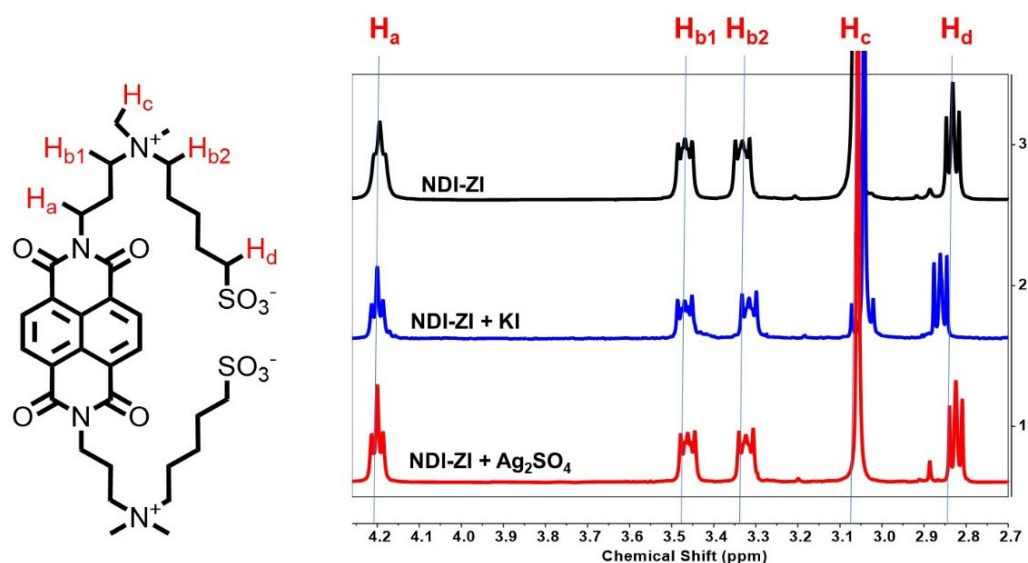

**Fig. S15**  $^1\text{H}$  NMR spectra of NDI-ZI without and with KI or  $\text{Ag}_2\text{SO}_4$  in  $\text{D}_2\text{O}$ .  $^1\text{H}$  NMR analysis was also conducted with NDI-ZI dissolved in deuterium oxide ( $\text{D}_2\text{O}$ ) in the presence of 10 equivalents of KI or  $\text{Ag}_2\text{SO}_4$ . In the case of proton  $\text{H}_a$  at 4.22 ppm, which is close to N of imide with no ionic interaction with KI or  $\text{Ag}_2\text{SO}_4$ , no shift of peak position was observed. Meanwhile, the proton peaks near quaternary  $\text{N}^+$  ( $\text{H}_b$ ,  $\text{H}_c$ ) and  $-\text{SO}_3^-$  ( $\text{H}_d$ ) of NDI-ZI are clearly shifted by adding external ion source, due to the change in the dynamic ionic coulombic interaction. Upon addition of excess KI, the ionic  $\text{NR}_4^+$  and  $\text{RSO}_3^-$  groups have coulombic interaction with  $\text{I}^-$  and  $\text{K}^+$ , respectively. According to the NMR spectra (shown in Figure R2), upshift of  $\text{H}_{b2}$  and  $\text{H}_c$  peaks was observed from 3.33 and 3.07 ppm to 3.31 and 3.04 ppm, respectively. The upshift originated from that the ionic interaction of  $\text{NR}_4^+ - \text{RSO}_3^-$  is changed into  $\text{NR}_4^+ - \text{I}^-$ . Similarly, the downshift of  $\text{H}_d$  (from 2.83 to 2.86 ppm) can be understood in terms of a new ionic interaction of  $\text{RSO}_3^- - \text{K}^+$ . When excess  $\text{Ag}_2\text{SO}_4$  was mixed with NDI-ZI, the  $\text{H}_d$  peak showed a clear upshift (from 2.83 to 2.81 ppm) due to formation of coulombic interaction between  $\text{RSO}_3^-$  and  $\text{Ag}^+$ . The NMR data strongly support that zwitterionic NDI-ZI have ionic coulombic interactions with both positive and negative ions.

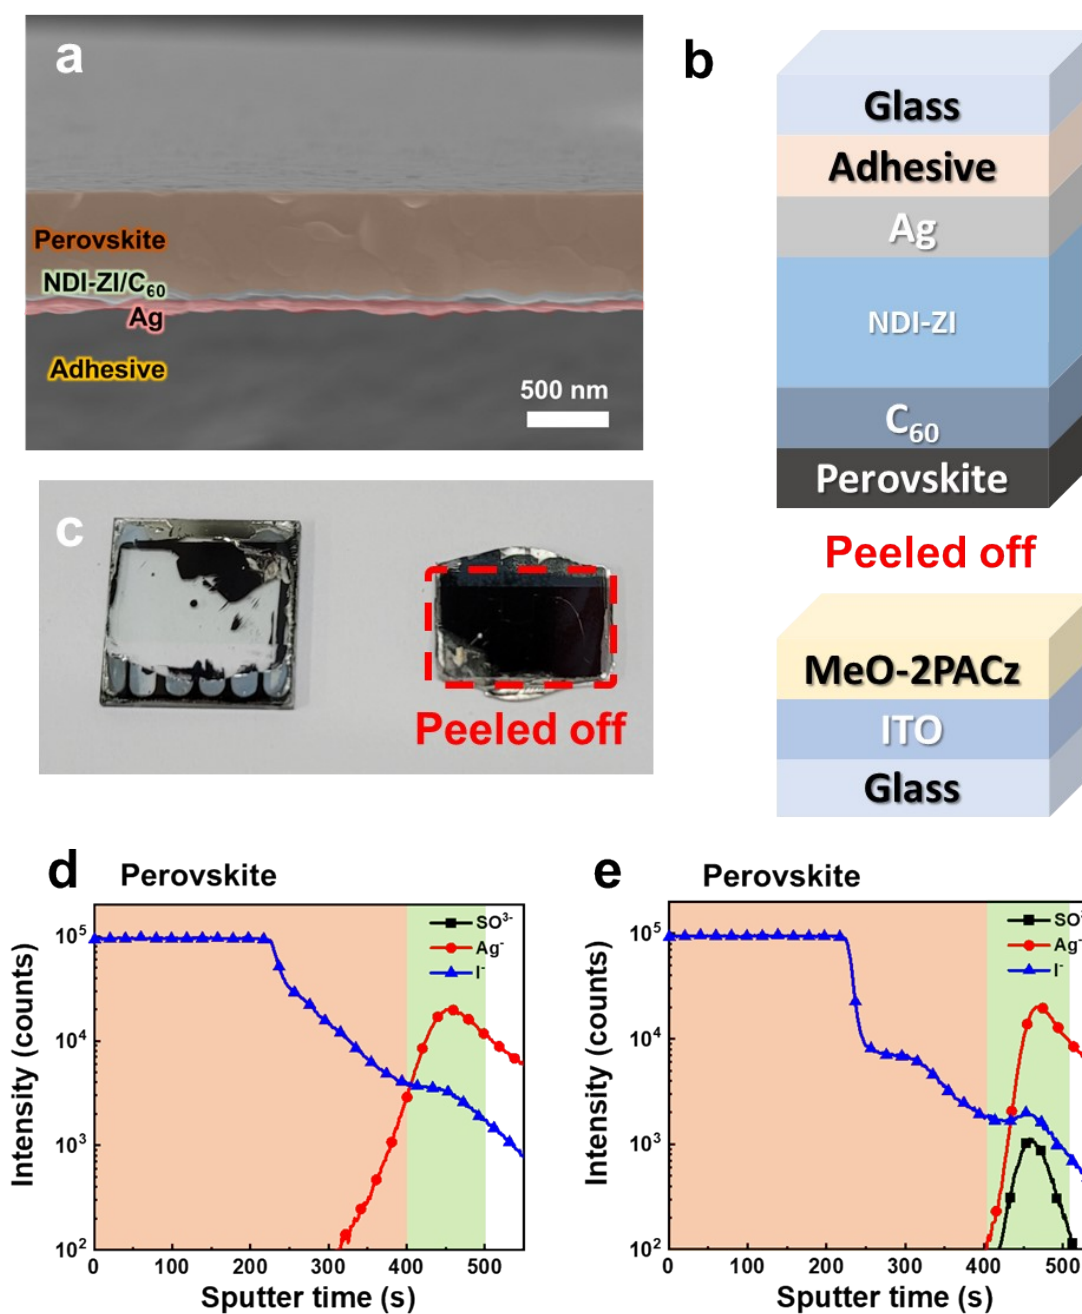

**Fig. S16** (a) Cross-sectional SEM, (b) device structure, and (c) photographic images of peeled off perovskite films from device. ToF-SIMS depth profiles of (d) without and (e) with NDI-ZI layer after light soaking test for 500 hrs under continuous 1-sun illumination at room temperature and RH 25%.

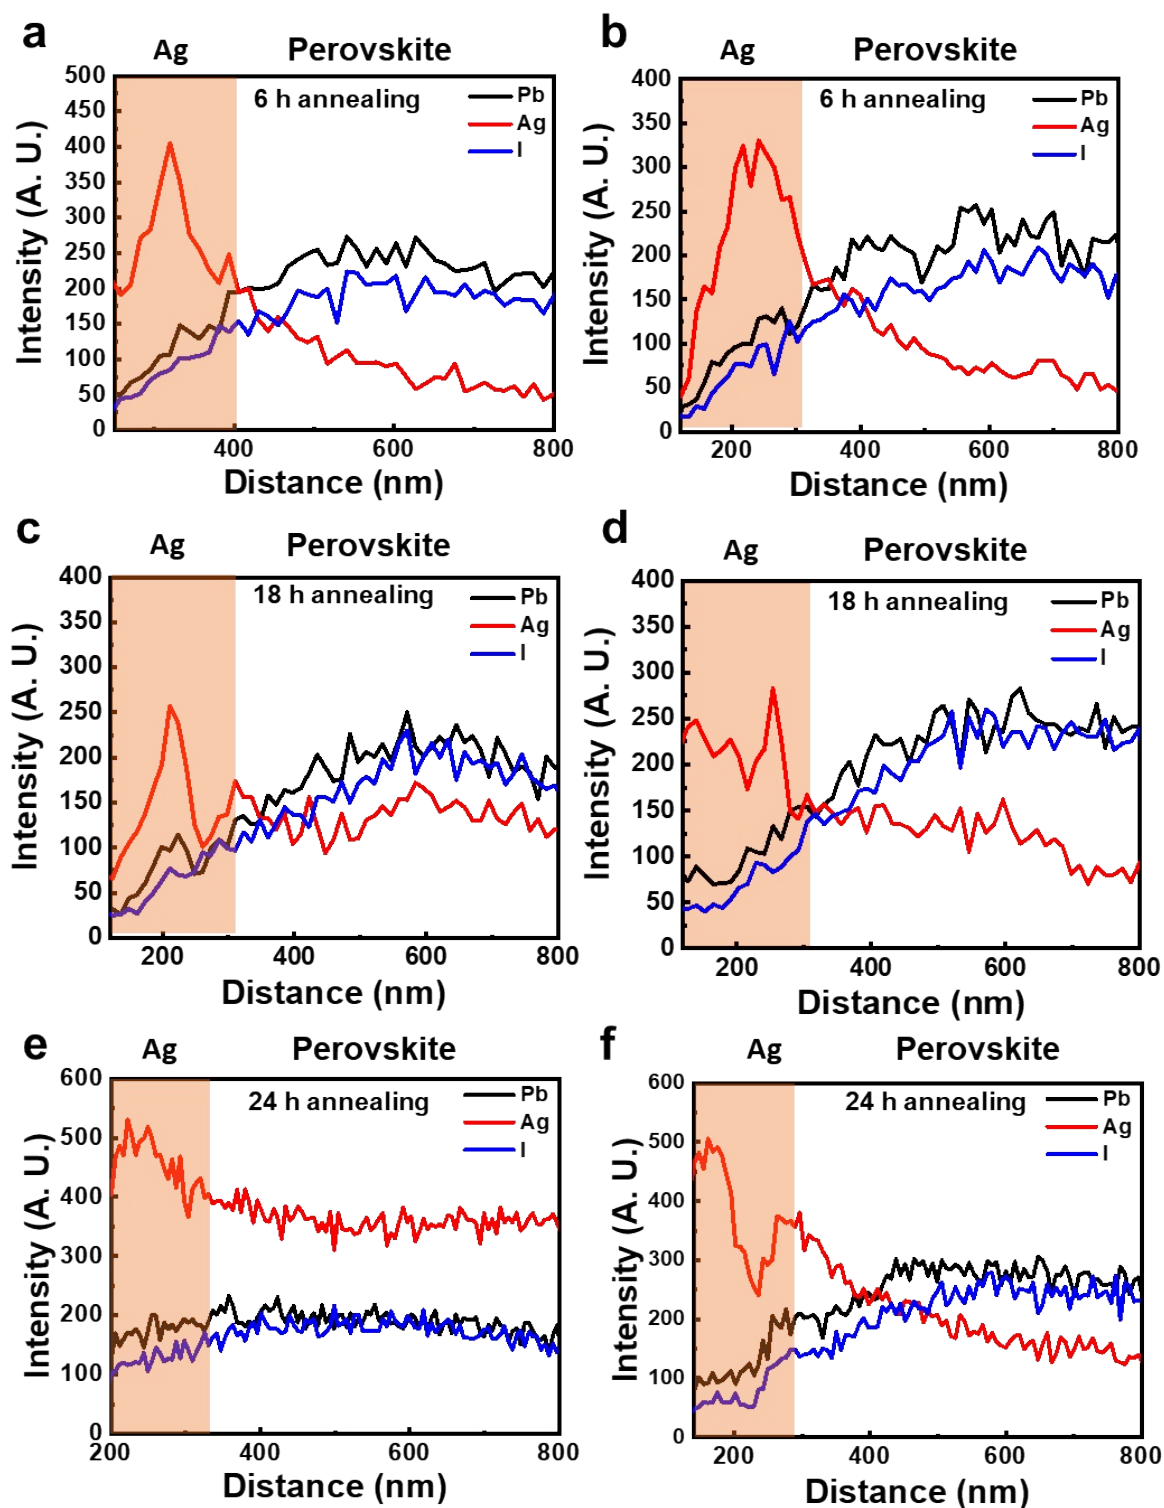

**Fig. S17** EDS linecut depth profiles of PeSCs without (a, c, and e) and with NDI-ZI (b, d, and f) after thermal treatments at 90 °C by varying the annealing time. Reference devices annealed for (a) 6 hrs, (c) 18 hrs, and (e) 24 hrs. Devices with NDI-ZI annealed for (b) 6 hrs, (d) 18 hrs, and (f) 24 hrs.

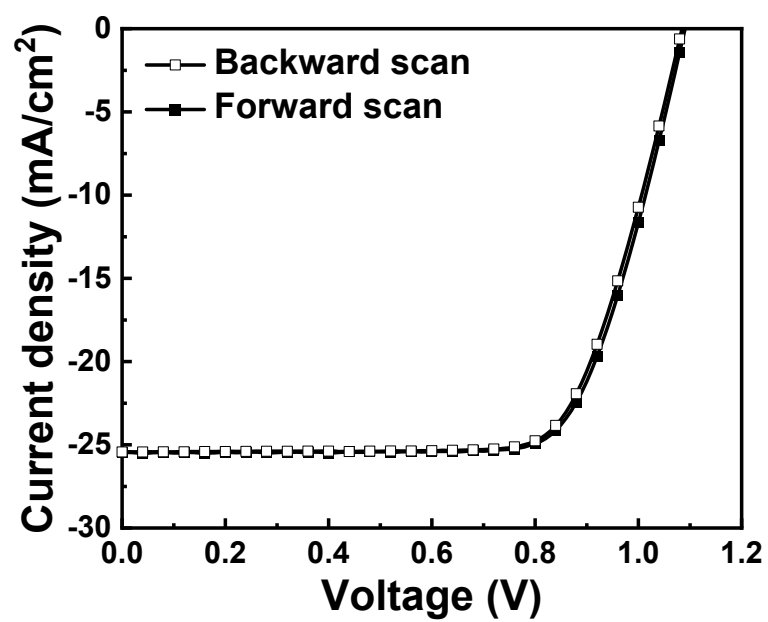

**Fig. S18**  $J$ - $V$  curves of 1 cm<sup>2</sup> area PeSCs with NDI-ZI with anti-reflection film under backward and forward scans.

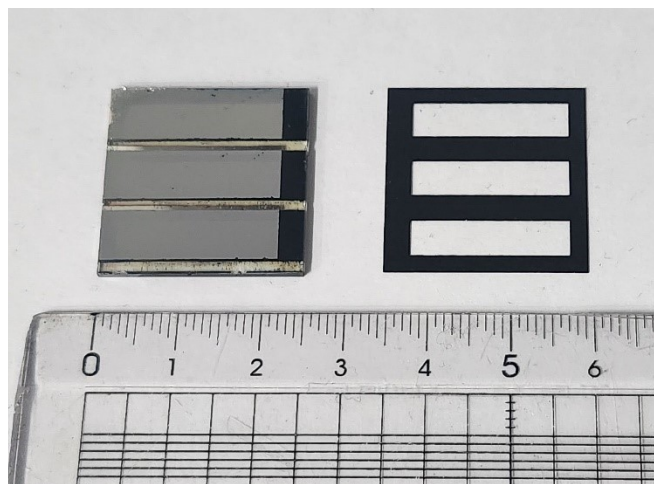

**Fig. S19** Photographic images of mini module and aperture mask.

**Table S1** Photovoltaic parameters of PeSCs by varying the thickness of NDI-ZI interlayer.

| [NDI-ZI]  | $V_{oc}$<br>[V] | $J_{sc}$<br>[mA cm <sup>-2</sup> ] | FF<br>[%] | PCE<br>[%] |
|-----------|-----------------|------------------------------------|-----------|------------|
| 0.1 mg/mL | 1.08            | 24.40                              | 82.16     | 21.60      |
| 0.5 mg/mL | 1.08            | 24.30                              | 82.48     | 21.60      |
| 1 mg/mL   | 1.08            | 25.20                              | 82.84     | 22.50      |
| 3 mg/mL   | 1.10            | 25.10                              | 78.18     | 21.80      |
| 5 mg/mL   | 1.05            | 25.20                              | 71.29     | 18.90      |
| 7 mg/mL   | 0.77            | 23.30                              | 53.00     | 9.50       |

**Table S2** Photovoltaic parameters of PeSCs with and without NDI-ZI interlayer under backward and forward scans.

|           | Scan<br>direction | $V_{oc}$<br>[V] | $J_{sc}$<br>[mA cm <sup>-2</sup> ] | FF<br>[%] | PCE<br>[%] | HI <sup>a</sup><br>[%] |
|-----------|-------------------|-----------------|------------------------------------|-----------|------------|------------------------|
| Ref.      | Backward          | 1.09            | 23.84                              | 81.42     | 21.16      | 3.1                    |
|           | Forward           | 1.09            | 23.60                              | 79.60     | 20.50      |                        |
| w/ NDI-ZI | Backward          | 1.07            | 25.60                              | 83.15     | 22.80      | 1.3                    |
|           | Forward           | 1.06            | 25.30                              | 83.80     | 22.50      |                        |

<sup>a</sup>Hysteresis index.

**Table S3** Photovoltaic parameters of large-area (1 cm<sup>2</sup>) PeSCs with NDI-ZI interlayer under backward and forward scans.

| Scan direction | $V_{oc}$<br>[V] | $J_{sc}$<br>[mA cm <sup>-2</sup> ] | $FF$<br>[%] | PCE<br>[%] | HI <sup>a</sup><br>[%] |
|----------------|-----------------|------------------------------------|-------------|------------|------------------------|
| Backward       | 1.10            | 25.50                              | 72.32       | 20.30      | 0.98                   |
| Forward        | 1.08            | 25.40                              | 72.98       | 20.10      |                        |

<sup>a</sup>Hysteresis index.

**Table S4.** Summarized performance and device stability of inverted PeSCs reported in the previous studies.

| Structure                                                                                                                                                                                            | PCE<br>[%] | Stability<br>[h] | Condition                | MPP tracking<br>[h] | Ref. |
|------------------------------------------------------------------------------------------------------------------------------------------------------------------------------------------------------|------------|------------------|--------------------------|---------------------|------|
| ITO/MeO-2PACz/<br>Cs <sub>0.05</sub> (MA <sub>0.1</sub> FA <sub>0.9</sub> ) <sub>0.95</sub> Pb(I <sub>0.9</sub> Br <sub>0.1</sub> ) <sub>3</sub> /MPA/2D<br>perovskite/PCBM/BCP/Ag                   | 24.85      | 800<br>(92%)     | unencapsulated<br>RH 60% | NA                  | 4    |
| ITO/MeO-2PACz/<br>Cs <sub>0.05</sub> (FA <sub>0.98</sub> MA <sub>0.02</sub> ) <sub>0.95</sub> Pb(I <sub>0.98</sub><br>Br <sub>0.02</sub> ) <sub>3</sub> /PCBM/BCP/Ag                                 | 24.6       | NA               | NA                       | 1000<br>(96%)       | 5    |
| FTO/NiO <sub>x</sub> /Me-<br>4PACz/DPPP/FA <sub>0.95</sub> Cs <sub>0.05</sub> PbI <sub>3</sub> /<br>PEAI/C <sub>60</sub> /SnO <sub>2</sub> /Ag                                                       | 23.9       | 1500<br>(90%)    | 85 °C                    | 3500<br>(100%<)     | 6    |
| ITO/PTAA/<br>(FA <sub>0.98</sub> MA <sub>0.02</sub> ) <sub>0.95</sub> Cs <sub>0.05</sub> Pb(I <sub>0.95</sub><br>Br <sub>0.02</sub> ) <sub>3</sub> /FcTc <sub>2</sub> /C <sub>60</sub> /BCP/Ag       | 24.5       | 1000<br>(95%)    | 85 °C/RH<br>85%          | 1500<br>(98%)       | 7    |
| ITO/NiO <sub>x</sub> /PTAA/Al <sub>2</sub> O <sub>3</sub> /FA <sub>0.95</sub><br>Cs <sub>0.05</sub> PbI <sub>3</sub> /<br>PCBM/BCP/Ag                                                                | 24.67      | 864<br>(98%)     | 85 °C                    | 1008<br>(84%)       | 8    |
| ITO/PTAA/Al <sub>2</sub> O <sub>3</sub> /FA <sub>0.83</sub> Cs <sub>0.17</sub><br>Pb(I <sub>0.8</sub> Br <sub>0.2</sub> ) <sub>3</sub> /<br>LiBr/C <sub>70</sub> /Zr(acac) <sub>4</sub> /Au          | 20.2       | 1410<br>(80%)    | MPP/<br>65 °C            | NA                  | 9    |
| FTO/NiO <sub>x</sub> /4PACz/(Cs <sub>0.05</sub> MA <sub>0.05</sub><br>FA <sub>0.90</sub> PbI <sub>3</sub> ) <sub>0.95</sub> (MAPbCl <sub>3</sub> ) <sub>0.05</sub> /<br>DMDP/C <sub>60</sub> /BCP/Ag | 25.9       | 1600<br>(95%)    | 85 °C                    | 2000<br>(96%)       | 10   |
| ITO/DMAcPA+CsFAMAPb(I <sub>x</sub>                                                                                                                                                                   | 25.4       | NA               | NA                       | 1000                | 11   |

|                                                                                                                                                                                                          |       |            |                      |            |           |
|----------------------------------------------------------------------------------------------------------------------------------------------------------------------------------------------------------|-------|------------|----------------------|------------|-----------|
| Br <sub>y</sub> ) <sub>3</sub> /PCBM/BCP/Ag                                                                                                                                                              |       |            |                      | (96.6%)    |           |
| FTO/2PACz+3-MPA/Cs <sub>0.05</sub> MA <sub>0.1</sub> FA <sub>0.85</sub> PbI <sub>3</sub> + MACl+GuaSCN/C <sub>60</sub> /BCP/Ag                                                                           | 24.8  | 1000 (95%) | AM 1.5G/65 °C/RH 85% | NA         | 12        |
| ITO/PTAA/perovskite/C <sub>60</sub> /BCP/Ag                                                                                                                                                              | 25.8% | 300 (90%)  | AM 1.5G/65 °C/RH 85% | 2500 (92%) | 13        |
| ITO/2-PACZ/FA <sub>0.85</sub> MA <sub>0.1</sub> Cs <sub>0.05</sub> PbI <sub>3</sub> /C <sub>60</sub> /BCP/Cu                                                                                             | 25.6  | 400 (89%)  | 85 °C/RH 85%         | 1000 (94%) | 14        |
| FTO/NiO <sub>x</sub> /Me-4PACz/FAPbI <sub>3</sub> /PCBM/SnO <sub>2</sub> /Cu                                                                                                                             | 25.2  | 500 (85%)  | 85 °C                | 1000 (85%) | 15        |
| ITO/NiO <sub>x</sub> /MeO-4PADBC/Cs <sub>0.05</sub> FA <sub>0.85</sub> MA <sub>0.1</sub> PbI <sub>3</sub> /C <sub>60</sub> /BCP/Ag                                                                       | 25.6  | 1200 (74%) | 85 °C                | 1200 (96%) | 16        |
| ITO/2PACz/Cs <sub>0.05</sub> FA <sub>0.8</sub> MA <sub>0.15</sub> PbI <sub>3</sub> /C <sub>60</sub> /BCP/Ag                                                                                              | 24.09 | 1600 (85%) | 85 °C/RH 50%         | NA         | 17        |
| ITO/Al <sub>2</sub> O <sub>3</sub> /PTAA/NiO <sub>x</sub> /Cs <sub>0.05</sub> FA <sub>0.95</sub> PbI <sub>3</sub> /PCBM/BCP/Ag                                                                           | 25.16 | 1200 (92%) | 85 °C/RH 85%         | 1500 (98%) | 18        |
| ITO/Me-4PACz/Cs <sub>0.05</sub> FA <sub>0.8</sub> MA <sub>0.15</sub> Pb(I <sub>0.75</sub> Br <sub>0.25</sub> ) <sub>3</sub> +Me-4PACz/C <sub>60</sub> /BCP/Ag                                            | 24.50 | NA         | NA                   | 1200 (91%) | 19        |
| ITO/p-PY/Cs <sub>0.02</sub> FA <sub>0.98</sub> PbI <sub>3</sub> +DBSO/2-CF <sub>3</sub> -PEAI/PCBM/BCP/Ag                                                                                                | 25.1  | 1000 (98%) | 85 °C/RH 85%         | 1800 (97%) | 20        |
| ITO/NiO <sub>x</sub> /Me-4PACz+PC/Cs <sub>0.05</sub> (FA <sub>0.98</sub> MA <sub>0.02</sub> ) <sub>0.95</sub> Pb(I <sub>0.98</sub> Br <sub>0.02</sub> ) <sub>3</sub> /PEABr/PCBM+C <sub>60</sub> /BCP/Ag | 25.09 | NA         | NA                   | 1000 (90%) | 21        |
| NiO <sub>x</sub> /p-F-PEAI/Cs <sub>0.05</sub> FA <sub>0.85</sub> MA <sub>0.1</sub> Pb <sub>3</sub> /C <sub>60</sub> /BCP/Cu                                                                              | 22.93 | 1000 (85%) | RH 50%               | 700 (80%)  | 22        |
| ITO/MeO-2PACz/FA <sub>0.85</sub> Cs <sub>0.15</sub> PbI <sub>3</sub> /C <sub>60</sub> /NDI-ZI/Ag                                                                                                         | 23.30 | 1500 (80%) | 85 °C                | 450 (80%)  | This work |

\*Parentheses indicate the ratio of PCE to the initial PCE after stability test.

\*The stability tests were listed with their methods and the ISOS-L-1 protocol was chosen as the MPP tracking standard (1-sun illumination, ambient temperature).



## References

1. Q. Liao, Q. Kang, Y. Yang, Z. Zheng, J. Qin, B. Xu and J. Hou, *CCS Chem.* 2022, **4**, 938.
2. Y. Miyake, T. Nagata, H. Tanaka, M. Yamazaki, M. Ohta, R. Kokawa and T. Ogawa, *ACS Nano* 2012, **6**, 3876.
3. A. K. Harit, E. D. Jung, J. M. Ha, J. H. Park, A. Tripathi, Y. W. Noh, M. H. Song and H. Y. Woo, *Small* 2022, **18**, 2104933.
4. X. Zang, S. Xiong, S. Jiang, D. Li, H. Wu, H. Ren, A. Cao, B. Li, Z. Ma, J. Chen, L. Ding, J. Tang, Z. Sun, J. Chu and Q. Bao, *Adv. Mater.* 2023, 2309991.
5. G. Li, Z. Su, L. Canil, D. Hughes, M. H. Aldamasy, J. Dagar, S. Trofimov, L. Wang, W. Zuo, J. J. Jerónimo-Rendon, M. M. Byranvand, C. Wang, R. Zhu, Z. Zhang, F. Yang, G. Nasti, B. Naydenov, W. C. Tsoi, Z. Li, X. Gao, Z. Wang, Y. Jia, E. Unger, M. Saliba, M. Li and A. Abate, *Science* 2023, **379**, 399-403.
6. C. Li, X. Wang, F. Jiang, S. M. Park, Y. Li, L. Chen, Z. Wang, L. Zeng, H. Chen, Y. Liu, C. R. Grice, A. Abudulimu, J. Chung, Y. Xian, T. Zhu, H. Lai, B. Chen, R. J. Ellingson, F. Fu, D. S. Ginger, Z. Song, E. H. Sargent and Y. Yan, *Science* 2023, **379**, 690-694.
7. Z. Li, B. Li, X. Wu, S. A. Sheppard, S. Zhang, D. Gao, N. J. Long and Z. Zhu *Science* 2022, **376**, 416-420.
8. C. Zhang, H. Li, C. Gong, Q. Zhuang, J. Chen Z. Zang, *Energy Environ. Sci.* 2023, **16**, 3825-3836.
9. D. P. McMeekin, P. Holzhey, S. O. Furer, S. P. Harvey, L. T. Schelhas, J. M. Ball, S. Mahesh, S. Seo, N. Hawkins, J. Lu, M. B. Johnston, J. J. Berry, U. Bach and H. J. Snaith *Nat. Mater.* 2023, **22**, 73-83.

10. C. Liu, Y. Yang, H. Chen, J. Xu, A. Liu, A. S. R. Bati, H. Zhu, L. Grater, S. S. Hadke, C. Huang, V. K. Sangwan, T. Cai, D. Shin, L. X. Chen, M. C. Hersam, C. A. Mirkin, B. Chen, M. G. Kanatzidis and E. H. Sargent, *Science* 2023, **382**, 810-815.
11. Q. Tan, Z. Li, G. Luo, X. Zhang, B. Che, G. Chen, H. Gao, D. He, G. Ma, J. Wang, J. Xiu, H. Yi, T. Chen and Z. He, *Nature* 2023, **620**, 545–551.
12. S. M. Park, M. Wei, N. Lempesis, W. Yu, T. Hossain, L. Agosta, V. Carnevali, H. R. Atapattu, P. Serles, F. T. Eickemeyer, H. Shin, M. Vafaie, D. Choi, K. Darabi, E. D. Jung, Y. Yang, D. B. Kim, S. M. Zakeeruddin, B. Chen, A. Amassian, T. Filleter, M. G. Kanatzidis, K. R. Graham, L. Xiao, U. Rothlisberger, M. Grätzel and E. H. Sargent, *Nature* 2023, **624**, 289-294.
13. Z. Liang, Y. Zhang, H. Xu, W. Chen, B. Liu, J. Zhang, H. Zhang, Z. Wang, D. Kang, J. Zeng, X. Gao, Q. Wang, H. Hu, H. Zhou, X. Cai, X. Tian, P. Reiss, B. Xu, T. Kirchartz, Z. Xiao, S. Dai, N. Park, J. Ye and X. Pan, *Nature* 2023, **624**, 557-563.
14. P. Zhu, D. Wang, Y. Zhang, Z. Liang, J. Li, Z. Zeng, J. Zhang, Y. Xu, S. Wu, Z. Liu, X. Zhou, B. Hu, F. He, L. Zhang, X. Pan, X. Wang, N. G. Park and B. Xu, *Science* 2024, **383**, 524-531.
15. S. Yu, Z. Xiong, H. Zhou, Q. Zhang, Z. Wang, F. Ma, Z. Qu, Y. Zhao, X. Chu, X. Zhang and J. You, *Science* 2023, **382**, 1399-1404.
16. Z. Li, X. Sun, X. Zheng, B. Li, D. Gao, S. Zhang, X. Wu, S. Li, J. Gong, J. M. Luther, Z. Li and Z. Zhu, *Science* 2023, **382**, 284-289.
17. S. M. Park, M. Wei, J. Wu, H. R. Atapattu, F. T. Eickemeyer, K. Darabi, L. Grater, Y. Yang, C. Liu, S. Teale, B. Chen, H. Chen, T. Wang, L. Zeng, A. Maxwell, Z. Wang, K. R. Rao, Z. Cai, S. M. Zakeeruddin, J. T. Pham, C. M. Risko, A. Amassian, M. G. Kanatzidis, K. R. Graham, M. Gratzel and E. H. Sargent, *Science* 2023, **381**, 209-215.

18. H. Li, C. Zhang, C. Gong, D. Zhang, H. Zhang, Q. Zhuang, X. Yu, S. Gong, X. Chen, J. Yang, X. Li, R. Li, J. Li, J. Zhou, H. Yang, Q. Lin, J. Chu, M. Gratzel, J. Chen and Z. Zang, *Nat. Mater.* 2023, **8**, 946-955.
19. X. Zheng, Z. Li, Y. Zhang, M. Chen, T. Liu, C. Xiao, D. Gao, J. B. Patel, D. Kuciauskas, A. Magomedov, R. A. Scheidt, X. Wang, S. P. Harvey, Z. Dai, C. Zhang, D. Morales, H. Pruett, B. M. Wieliczka, A. R. Kirmani, N. P. Padture, K. R. Graham, Y. Yan, M. K. Nazeeruddin, M. D. McGehee, Z. Zhu and J. M. Luther, *Nat. Energy* 2023, **8**, 462-472.
20. R. Chen, J. Wang, Z. Liu, F. Ren, S. Liu, J. Zhou, H. Wang, X. Meng, Z. Zhang, X. Guan, W. Liang, P. A. Troshin, Y. Qi, L. Han and W. Chen, *Nat Energy* 2023, **8**, 839–849.
21. Q. Cao, T. Wang, X. Pu, X. He, M. Xiao, H. Chen, L. Zhuang, Q. Wei, H. L. Loi, P. Guo, B. Kang, G. Feng, J. Zhuang, X. Li and F. Yan, *Adv. Mater.* 2024, 2311970.
22. Z. Jiang, D. Wang, J. Sun, B. Hu, L. Zhang, X. Zhou, J. Wu, H. Hu, J. Zhang, W. C. H. Choy and B. Xu, *Small Methods*, **8**, 2300241.
